# Supplementary material for: Factors associated with the quality of corneas retrieved for transplantation by Eye Banks: a scoping review protocol
Source: PubMed Central journal article supplement — BMJ Open. 2024 Jul 17;14(7):e086453. doi: 10.1136/bmjopen-2024-086453 (PMC11256063; doi:10.1136/bmjopen-2024-086453), 2024-07-17
Supplement: bmjopen-14-7-s002.pdf [file bmjopen-14-7-s002.pdf]

**Supplementary file 2.** Databases and Collections of Indexed and Gray Literature for applying search strategies (Boxes 1, 2 and 3).

**Box 1:** Sources of Indexed Literature Information identified via the CAPES Journals Portal - Ophthalmology Subarea. Brazil, 2024.

|                                                                                        |
|----------------------------------------------------------------------------------------|
| <b>1- Academic Search Premier - ASP (EBSCO)</b>                                        |
| <b>2- ACS Journals Search</b>                                                          |
| <b>3- AIP Scitation - American Institute of Physics</b>                                |
| <b>4- JAMA Network (AMA)</b>                                                           |
| <b>5- Begell House Digital Library</b>                                                 |
| <b>6- Bentham Science</b>                                                              |
| <b>7- Biochemical Society – Journals</b>                                               |
| <b>8- American Association of Critical Care Nurses</b>                                 |
| <b>9- Cell Press Collection (Elsevier)</b>                                             |
| <b>10- ScienceDirect (Elsevier)</b>                                                    |
| <b>11- Association of Clinical Scientists</b>                                          |
| <b>12- EMBASE (Elsevier)</b>                                                           |
| <b>13- FSTA - Food Science and Technology Abstracts (EBSCO)</b>                        |
| <b>14- Incites Journal Citation Reports - JCR (Clarivate Analytics) (estatísticas)</b> |
| <b>15- Cortellis Drug Discovery Intelligence - CDDI (Clarivate Analytics)</b>          |
| <b>16- Ovid (Journals Full Text)</b>                                                   |
| <b>17- Karger</b>                                                                      |
| <b>18- Oxford Journals (Oxford University Press)</b>                                   |
| <b>19- PNAS - Proceedings of the National Academy of Sciences</b>                      |
| <b>20- SAGE Journals Online</b>                                                        |
| <b>21- Science (AAAS)</b>                                                              |
| <b>22- SCOPUS (Elsevier)</b>                                                           |
| <b>23- Slack Inc</b>                                                                   |
| <b>24- SPORTDiscus with Full Text (EBSCO)</b>                                          |
| <b>25- Springer Book Archives</b>                                                      |

Legend: Systematized search carried out on 19/02/2024.

**Box 2:** Sources of Indexed Literature Information accessed via the CAPES Journals Portal – Search by titles. Brazil, 2024.

|                                                                                  |
|----------------------------------------------------------------------------------|
| <b>1- MEDLINE/PubMed (via National Library of Medicine)</b>                      |
| <b>2- Web of Science - Coleção Principal (Clarivate Analytics)</b>               |
| <b>3- Virtual Health Library :BVS (BIREME) - Portal Regional</b>                 |
| <b>4- CINAHL</b>                                                                 |
| <b>5- Library, Information Science &amp; Technology Abstracts with Full Text</b> |

Legend: Convenience search carried out on 19/02/2024.

**Box 3:** Sources of Gray Literature Information accessed through a web browser. Brazil, 2024.

|                                                                        |
|------------------------------------------------------------------------|
| <b>1- Information System – Opengrey</b>                                |
| <b>2- CAPES Theses &amp; Dissertations Catalog</b>                     |
| <b>3- Brazilian Digital Library of Theses and Dissertations (BDTD)</b> |
| <b>4- National Library of Australia (Trove)</b>                        |

|                                                                                     |
|-------------------------------------------------------------------------------------|
| <b>5- Portuguese Open Access Scientific Repository (RCAAP)</b>                      |
| <b>6- Cyberthesis</b>                                                               |
| <b>7- Portal of Europe – E-thesis (DART)</b>                                        |
| <b>8- Library Electronic Theses Online Service (EThOS)</b>                          |
| <b>9- Academic Archive Online (DIVA)</b>                                            |
| <b>10- Canada – Theses Canada</b>                                                   |
| <b>11- South Africa – National Theses and Dissertations (ETD Portal)</b>            |
| <b>12- ProQuest™ Dissertations &amp; Theses Citation Index (via Web of Science)</b> |

Legend: Convenience search carried out on 19/02/2024.
