# Supplementary material for: Factors associated with the quality of corneas retrieved for transplantation by Eye Banks: a scoping review protocol
Source: PubMed Central journal article supplement — BMJ Open. 2024 Jul 17;14(7):e086453. doi: 10.1136/bmjopen-2024-086453 (PMC11256063; doi:10.1136/bmjopen-2024-086453), 2024-07-17
Supplement: bmjopen-14-7-s003.pdf [file bmjopen-14-7-s003.pdf]

**Supplementary file 3.** Medical Subject Headings (MeSH), Health Sciences Descriptors (DeCS), EMTREE thesaurus, and keywords

**Medical Subject Headings (MeSH)**

| <b>Descriptor</b> | <b>Main term</b>             | <b><i>“Entry term”/ alternative term / Synonyms</i></b>                                                                                                                                                                                                                                                                                                                                                                 |
|-------------------|------------------------------|-------------------------------------------------------------------------------------------------------------------------------------------------------------------------------------------------------------------------------------------------------------------------------------------------------------------------------------------------------------------------------------------------------------------------|
| <b>MeSH (A)</b>   | Cornea                       | Corneas                                                                                                                                                                                                                                                                                                                                                                                                                 |
| <b>MeSH (B)</b>   | Corneal Transplantation      | Transplantation, Cornea; Keratoplasty; Keratoplasties; Cornea Transplantation; Cornea Transplantations; Transplantations, Cornea; Transplantation, Corneal; Corneal Transplantations; Transplantations, Corneal; Grafting, Corneal; Corneal Grafting; Corneal Grafting; Graftings, Corneal; Keratoplasty, Lamellar; Keratoplasties, Lamellar; Lamellar Keratoplasties; Lamellar Keratoplasty; Penetrating Keratoplasty. |
| <b>MeSH (C)</b>   | Tissue and Organ Procurement | Organ Procurement; Organ Procurements; Organ Procurement Systems; Organ Procurement System; Tissue Shortage; Shortage, Tissue; Tissue Shortages; Organ Shortage; Required Organ Donation Request; ;Required Request; Required Requests; Tissue Donation; Tissue Donations; Tissue Procurement; Tissue Procurements; Organ Donation; Organ Donations; Donor Cards; Donor Card.                                           |
| <b>MeSH (D)</b>   | Eye Banks                    | Bank, Eye; Banks, Eye; Eye Bank.                                                                                                                                                                                                                                                                                                                                                                                        |

**Health Sciences Descriptors (DeCS) in English**

|                 |                         |                                                                                                                                                                                                                  |
|-----------------|-------------------------|------------------------------------------------------------------------------------------------------------------------------------------------------------------------------------------------------------------|
| <b>DeCS (E)</b> | Cornea                  | Corneas                                                                                                                                                                                                          |
| <b>DeCS (F)</b> | Corneal Transplantation | Transplantation, Cornea; Keratoplasty; Keratoplasties; Cornea Transplantation; Cornea Transplantations; Transplantations, Cornea; Transplantation, Corneal; Corneal Transplantations; Transplantations, Corneal; |

|                                                         |                              |                                                                                                                                                                                                                                                                                                                                                                                                                                                           |
|---------------------------------------------------------|------------------------------|-----------------------------------------------------------------------------------------------------------------------------------------------------------------------------------------------------------------------------------------------------------------------------------------------------------------------------------------------------------------------------------------------------------------------------------------------------------|
|                                                         |                              | Grafting, Corneal; Corneal Grafting; Corneal Grafting; Graftings, Corneal; Keratoplasty, Lamellar; Keratoplasties, Lamellar; Lamellar Keratoplasties; Lamellar Keratoplasty.                                                                                                                                                                                                                                                                              |
| <b>DeCS (G)</b>                                         | Tissue and Organ Procurement | Organ Procurement; Organ Procurements; Organ Procurement Systems; Organ Procurement System; Tissue Shortage; Shortage, Tissue; Tissue Shortages; Organ Shortage; Required Organ Donation Request; ;Required Request; Required Requests; Tissue Donation; Tissue Donations; Tissue Procurement; Tissue Procurements; Organ Donation; Organ Donations; Donor Cards; Donor Card.                                                                             |
| <b>DeCS (H)</b>                                         | Eye Banks                    | Bank, Eye; Banks, Eye; Eye Bank.                                                                                                                                                                                                                                                                                                                                                                                                                          |
| <b>Health Sciences Descriptors (DeCS) in Portuguese</b> |                              |                                                                                                                                                                                                                                                                                                                                                                                                                                                           |
| <b>DeCS (I)</b>                                         | Córnea                       | -                                                                                                                                                                                                                                                                                                                                                                                                                                                         |
| <b>DeCS (J)</b>                                         | Transplante de Córnea        | Ceratoplastia; Ceratoplastia Lamelar; Enxerto de Córnea; Transplantação de Córnea.                                                                                                                                                                                                                                                                                                                                                                        |
| <b>DeCS (K)</b>                                         | Obtenção de Tecidos e Órgãos | Cartão de Doador; Doação de Tecido; Doação de Tecidos; Doação de Tecidos e Órgãos; Doação de Órgão; Doação de Órgãos; Doação de Órgãos e Tecidos; Escassez de Tecidos; Escassez de Órgãos; Falta de Tecidos; Falta de Órgãos; Obtenção de Tecidos; Obtenção de Órgãos; Obtenção de Órgãos e Tecidos; Pedido de Doação de Órgão Necessário; Pedido de Doação de Órgãos Necessários; Pedido de Doação de Órgãos Requeridos; Sistemas de Obtenção de Órgãos. |
| <b>DeCS (L)</b>                                         | Bancos de Olhos              | Banco de Olhos                                                                                                                                                                                                                                                                                                                                                                                                                                            |

***Thesaurus Emtree***

|                   |                               |                                                                                                                                                                                              |
|-------------------|-------------------------------|----------------------------------------------------------------------------------------------------------------------------------------------------------------------------------------------|
| <b>EMTREE (M)</b> | <i>cornea</i>                 | <i>cornea chemistry; cornea development; cornea sensation; cornea structure.</i>                                                                                                             |
| <b>EMTREE (N)</b> | <i>cornea transplantation</i> | <i>cornea graft; cornea transplant; cornea xenotransplantation; corneal graft; corneal transplant; corneal transplantation; graft, corneal; transplant, corneal; transplantation, cornea</i> |
| <b>EMTREE (O)</b> | <i>transplantation</i>        | <i>graft enhancement, immunologic; immunologic graft enhancement; serial transplantation; tissue and organ procurement; transplantation surgery; transplants</i>                             |
| <b>EMTREE (P)</b> | <i>eye bank</i>               | <i>eye banks; eyebank eyebanks</i>                                                                                                                                                           |

---

**Keywords**

---

**Cornea Donation**

---

**Cornea Shortage**

---
